# Supplementary material for: Thyroid hormone-induced cell death in sea urchin metamorphic development
Source: Oxford University Press journal article supplement (doi:10.1242/jeb.244560), 2022-11-22
Supplement: jeb244560supp.pdf [file jeb244560supp.pdf]

**Table S1.**

[Click here to download Table S1](#)
